# Supplementary material for: Evaluation of Available Cognitive Tools Used to Measure Mild Cognitive Decline: A Scoping Review
Source: MDPI journal article supplement (doi:10.3390/nu13113974), 2021-11-08
Supplement: s1 [file s1]

**Supplementary Table S1.** The final search strategy for MEDLINE.

|    |                                                                                              |
|----|----------------------------------------------------------------------------------------------|
| 1  | <b>Dementia/or mild cognitive decline.mp. or Alzheimer Disease/or Cognitive Dysfunction/</b> |
| 2  | Mild cognitive impairment.mp                                                                 |
| 3  | Cognitive decline.mp                                                                         |
| 4  | 1 or 2 or                                                                                    |
| 5  | Neuropsychological Tests/or battery.tw.                                                      |
| 6  | Cognit* screen* tool*.mp.                                                                    |
| 7  | 5 or 6                                                                                       |
| 8  | 4 and 7                                                                                      |
| 9  | Limit to “middle aged (45 plus years)                                                        |
| 10 | Limit to English language                                                                    |
